# Supplementary material
Source: PubMed Central journal article supplement (PMC7551221)
Supplement: jamainternmed-e203214-s001.pdf [file jamainternmed-e203214-s001.pdf]

## Supplemental Online Content

Johnston JL, Dhruva SS, Ross JS, Rathi VK. Clinical evidence supporting US Food and Drug Administration clearance of novel therapeutic devices via the De Novo pathway between 2011 and 2019. *JAMA Intern Med.* Published online October 12, 2020. doi:10.1001/jamainternmed.2020.3214

**eTable.** Moderate-Risk Therapeutic Devices Cleared Through the FDA's De Novo Pathway Between 2011 and 2019

This supplemental material has been provided by the authors to give readers additional information about their work.

**eTable. Moderate-Risk Therapeutic Devices Cleared Through the FDA’s De Novo Pathway Between 2011 and 2019**

| <b>Device Name</b>                                             | <b>Device Manufacturer</b>                             | <b>Clearance Date</b> | <b>Therapeutic Area<sup>1</sup></b> | <b>Clinical use<sup>1</sup></b>                                                                                        |
|----------------------------------------------------------------|--------------------------------------------------------|-----------------------|-------------------------------------|------------------------------------------------------------------------------------------------------------------------|
| Hem-Avert Perianal Stabilizer                                  | Plexus Biomedical Inc.                                 | 01/13/2011            | Obstetrics/Gynecology               | Hemorrhoid prevention pressure wedge                                                                                   |
| WidexLink In Clear Series Hearing Aids                         | Widex Hearing Aid Company                              | 03/31/2011            | Otolaryngology                      | Hearing aid, air conduction with wireless technology                                                                   |
| Mandometer III <sup>2</sup>                                    | AB Mando                                               | 03/31/2011            | Neurology                           | Eating disorder conditioning tool                                                                                      |
| Lipflow Thermal Pulsation System (Formerly Manual Mini System) | Tearscience, Inc.                                      | 06/28/2011            | Ophthalmology                       | Eyelid thermal pulsation system                                                                                        |
| NuCLEUS and NuCLEUS-X BAV Catheter                             | Numed, Inc.                                            | 06/11/2012            | Cardiovascular                      | Balloon aortic valvuloplasty                                                                                           |
| Virulite Cold Sore Machine                                     | Virulite LLC                                           | 10/18/2012            | General & Plastic Surgery           | Light based treatment for cold sores herpes simplex virus-1                                                            |
| AHIP Internal Trigger Point Wand                               | National Center For Pelvic Pain Research Devices, Inc. | 11/20/2012            | Physical Medicine                   | Massager, therapeutic, to internally massage trigger points in the pelvic floor musculature                            |
| Bio-Seal Lung Biopsy Tract System                              | Angiotech                                              | 12/19/2012            | Anesthesiology                      | Absorbable lung biopsy plug                                                                                            |
| Cabochon System                                                | Cabochon Aesthetics, Inc.                              | 07/12/2013            | General & Plastic Surgery           | Powered surgical instrument for improvement in the appearance of cellulite                                             |
| UroLift System                                                 | NeoTract, Inc.                                         | 09/13/2013            | Gastroenterology & Urology          | Implantable transprostatic tissue retractor system                                                                     |
| eNeura Therapeutics® Cerena Transcranial Magnetic Stimulator   | eNeura Therapeutics LLC                                | 12/13/2013            | Neurology                           | Transcranial magnetic stimulator for the treatment of migraine headache                                                |
| Symphony Device                                                | Sensory Medical, Inc                                   | 12/18/2013            | Neurology                           | Vibratory counter-stimulation                                                                                          |
| AXIOS Stent and Delivery System                                | Xlumena, Inc                                           | 12/18/2013            | Gastroenterology & Urology          | Pancreatic stent, covered, metallic, removable                                                                         |
| Cefaly                                                         | STX-Med SPRL                                           | 03/11/2014            | Neurology                           | Stimulator, nerve, electrical, transcutaneous, for migraine                                                            |
| XSTAT                                                          | RevMedx, Inc.                                          | 04/03/2014            | General & Plastic Surgery           | Non-absorbable, expandable, hemostatic sponge for temporary internal use                                               |
| DEKA Arm System                                                | DEKA Integrated Solutions Corporation                  | 05/09/2014            | Physical Medicine                   | Upper extremity prosthesis with multiple simultaneous degrees of freedom and controlled via cutaneous electromyography |
| ReWalk                                                         | Argo Medical Technologies, Inc.                        | 06/26/2014            | Neurology                           | Powered exoskeleton                                                                                                    |

|                                                                                                                                                                         |                               |            |                            |                                                                                  |
|-------------------------------------------------------------------------------------------------------------------------------------------------------------------------|-------------------------------|------------|----------------------------|----------------------------------------------------------------------------------|
| Medtronic DUET External Drainage and Monitoring System                                                                                                                  | Medtronic Neurosurgery        | 08/22/2014 | Neurology                  | External cerebrospinal fluid (csf) diversion                                     |
| inFlow Intraurethral Valve-Pump and Activator                                                                                                                           | Vesiflo, Inc.                 | 10/14/2014 | Gastroenterology & Urology | Urethral insert with pump for bladder drainage                                   |
| Zap-It!                                                                                                                                                                 | Ecobrand, Ltd.                | 11/07/2014 | Neurology                  | Piezo-electric stimulator for relief of mosquito bite itch                       |
| Zanza-Click                                                                                                                                                             | Tecnimed S.r.l.               | 11/07/2014 | Neurology                  | Piezo-electric stimulator for relief of mosquito bite itch                       |
| Eclipse System                                                                                                                                                          | Pelvalon, Inc.                | 02/12/2015 | Gastroenterology & Urology | Dynamic rectal control system                                                    |
| Reza Band® Upper Esophageal Sphincter (UES) Assist Device                                                                                                               | Somna Therapeutics, LLC       | 03/06/2015 | Ear Nose Throat            | External upper esophageal sphincter (UES) compression device                     |
| Prolong                                                                                                                                                                 | Ergon Medical Ltd.            | 03/20/2015 | Gastroenterology & Urology | Vibrator for climax control of premature ejaculation                             |
| Brainport V100 Device                                                                                                                                                   | Wicab, Inc                    | 06/18/2015 | Ophthalmology              | Oral electronic vision aid                                                       |
| Esophageal Cooling Device                                                                                                                                               | Advanced Cooling Therapy, LLC | 06/23/2015 | Cardiovascular             | Esophageal thermal regulation and gastric suctioning device                      |
| EarLens™ Contact Hearing Device                                                                                                                                         | EarLens™ Corporation          | 09/29/2015 | Otolaryngology             | Tympanic membrane direct contact hearing aid                                     |
| Sonablate 450                                                                                                                                                           | Sonacare Medical, LLC.        | 10/09/2015 | Gastroenterology & Urology | High intensity ultrasound system for prostate tissue ablation                    |
| Dignitana AB Dignicap System                                                                                                                                            | Dignitana Ab                  | 12/08/2015 | General & Plastic Surgery  | Scalp cooling system                                                             |
| Newa™ Skin Therapy System                                                                                                                                               | EndyMed Medical Ltd.          | 12/18/2015 | General & Plastic Surgery  | Over-the-counter radiofrequency coagulation device for wrinkle reduction         |
| Cerêve Sleep System                                                                                                                                                     | Cerêve, Inc.                  | 05/13/2016 | Neurology                  | Thermal system for insomnia                                                      |
| WallFlex Biliary RX Fully Covered Stent System RMV                                                                                                                      | Boston Scientific             | 06/03/2016 | Gastroenterology & Urology | Biliary stent system for benign strictures                                       |
| Modified Trevo ProVue Retriever, Trevo XP ProVue Retriever 4x20mm, Trevo XP ProVue Retriever 3x20mm, Trevo XP ProVue Retriever 6x25mm, Trevo XP ProVue Retriever 4x30mm | Concentric Medical, Inc.      | 09/02/2016 | Neurology                  | Neurovascular mechanical thrombectomy device for acute ischemic stroke treatment |
| ACCLARENT AERA™ Eustachian Tube Balloon Dilation System                                                                                                                 | ACCLARENT, Inc.               | 09/16/2016 | Otolaryngology             | Eustachian tube balloon dilation device                                          |
| Sensor Monitored Alimentary Restriction Therapy (SMART) Device                                                                                                          | Scientific Intake             | 09/26/2016 | Gastroenterology & Urology | Oral removable retainer for weight management                                    |
| AeroForm® Tissue Expander System                                                                                                                                        | AirXpanders, Inc              | 12/21/2016 | General & Plastic Surgery  | Carbon dioxide gas controlled tissue expander                                    |
| Gammacore Non-Invasive Vagus Nerve Stimulator                                                                                                                           | Electrocore, LLC              | 04/14/2017 | Neurology                  | Non-invasive vagus nerve stimulator - headache                                   |

|                                                                |                                         |            |                            |                                                                               |
|----------------------------------------------------------------|-----------------------------------------|------------|----------------------------|-------------------------------------------------------------------------------|
| Oculeve Intranasal Tear Neurostimulator Device                 | Oculeve, Inc.                           | 04/24/2017 | Ophthalmology              | Intranasal electrostimulation device                                          |
| Sentinel Cerebral Protection System                            | Claret Medical, Inc.                    | 06/01/2017 | Cardiovascular             | Temporary catheter, embolic protection, transcatheter intracardiac procedures |
| Embosphere Microspheres                                        | Biosphere Medical S.A.                  | 06/21/2017 | Gastroenterology & Urology | Agents, embolic, for treatment of benign prostatic hyperplasia                |
| D2 Dressing <sup>2</sup>                                       | Z-Medica, LLC                           | 06/30/2017 | General & Plastic Surgery  | Temporary, internal use hemostatic                                            |
| ReSet                                                          | Pear Therapeutics, Inc.                 | 09/14/2017 | Neurology                  | Computerized behavioral therapy device for psychiatric disorders              |
| NSS-2 System                                                   | Innovative Health Solutions (IHS), Inc. | 11/15/2017 | Neurology                  | Percutaneous nerve stimulator for opioid withdrawal                           |
| IlluminOss Bone Stabilization System                           | IllminOss Medical, Inc.                 | 12/19/2017 | Orthopedics                | Rod, fixation, intramedullary and accessories, in-vivo cured, light-activated |
| AQUABEAM System                                                | PROCEPT BioRobotics Corporation         | 12/21/2017 | Gastroenterology & Urology | Fluid jet removal system                                                      |
| dermaPACE System                                               | SANUWAVE, Inc.                          | 12/28/2017 | General & Plastic Surgery  | Extracorporeal shock wave device for treatment of diabetic foot ulcers        |
| SkinPen Precision System                                       | Bellus Medical, LLC.                    | 03/01/2018 | General & Plastic Surgery  | Powered microneedle device                                                    |
| ThermoNeuroModulation Device, TNM Device                       | Scion NeuroStim, LLC                    | 03/26/2018 | Neurology                  | Thermal vestibular stimulator for headache                                    |
| Precision Flow® HVNI                                           | Vapotherm, Inc.                         | 04/10/2018 | Anesthesiology             | High flow/high velocity humidified oxygen delivery device                     |
| Cala ONE                                                       | Cala Health, Inc.                       | 04/26/2018 | Neurology                  | External upper limb tremor stimulator                                         |
| Hemospray® Endoscopic Hemostat                                 | Wilson-Cook Medical, Inc.               | 05/07/2018 | General & Plastic Surgery  | Hemostatic device for endoscopic gastrointestinal use                         |
| TrueTear Intranasal Tear Neurostimulator                       | Allergan                                | 05/17/2018 | Ophthalmology              | Intranasal electrostimulation device for dry eye symptoms                     |
| CURVE™ Positive Airway Pressure System                         | FRESCA Medical                          | 06/05/2018 | Anesthesiology             | Positive airway pressure system                                               |
| Natural Cycles                                                 | Natural Cycles Nordic AB                | 08/10/2018 | Obstetrics/Gynecology      | Device, fertility diagnostic, contraceptive, software application             |
| Brainsway Deep Transcranial Magnetic Stimulation (DTMS) System | Brainways Ltd.                          | 08/17/2018 | Neurology                  | Transcranial magnetic stimulation system for obsessive-compulsive disorder    |
| Bose Hearing Aid                                               | Bose Corporation                        | 10/05/2018 | Otolaryngology             | Self-fitting air-conduction hearing aid                                       |
| Innovo                                                         | Bio-Medical Research Ltd.               | 11/06/2018 | Gastroenterology & Urology | Cutaneous electrode stimulator for urinary incontinence                       |
| SEM Scanner (Model 200)                                        | Bruin Biometrics, LLC                   | 12/20/2018 | Gastroenterology & Urology | Pressure ulcer management tool                                                |

|                                                      |                                         |            |                            |                                                                                        |
|------------------------------------------------------|-----------------------------------------|------------|----------------------------|----------------------------------------------------------------------------------------|
| t:slim X2 insulin pump with interoperable technology | Tandem Diabetes Care, Inc.              | 02/14/2019 | Clinical Chemistry         | Alternate controller enabled insulin infusion pump                                     |
| ClearMate                                            | Thornhill Research, Inc.                | 03/14/2019 | Anesthesiology             | Isocapnic ventilation device                                                           |
| Plenity                                              | Gelesis, Inc.                           | 04/12/2019 | Gastroenterology & Urology | Ingested, transient, space occupying device for weight management and/or weight loss   |
| PREVENA 125 And PREVENA PLUS 125 Therapy Units       | KCI USA, Inc.                           | 04/19/2019 | General & Plastic Surgery  | Negative pressure wound therapy device for reduction of wound complications            |
| Monarch ETNS System                                  | NeuroSigma, Inc                         | 04/19/2019 | Neurology                  | Transcutaneous nerve stimulator for adhd                                               |
| Nerivio Migra                                        | Theranica Bioelectronics Ltd            | 05/20/2019 | Neurology                  | Distal transcutaneous electrical stimulator for treatment of acute migraine            |
| IB-Stim                                              | Innovative Health Solutions (IHS), Inc. | 06/07/2019 | Neurology                  | Non-implanted nerve stimulator for pain associated with irritable bowel syndrome (IBS) |

Source: FDA De Novo Database

(<https://www.accessdata.fda.gov/scripts/cdrh/cfdocs/cfPMN/denovo.cfm>)

<sup>1</sup> Per FDA-designated product codes

<sup>2</sup> Decision Summary document not available in FDA De Novo Database
